# Supplementary material
Source: PubMed Central journal article supplement (PMC2787458)

A

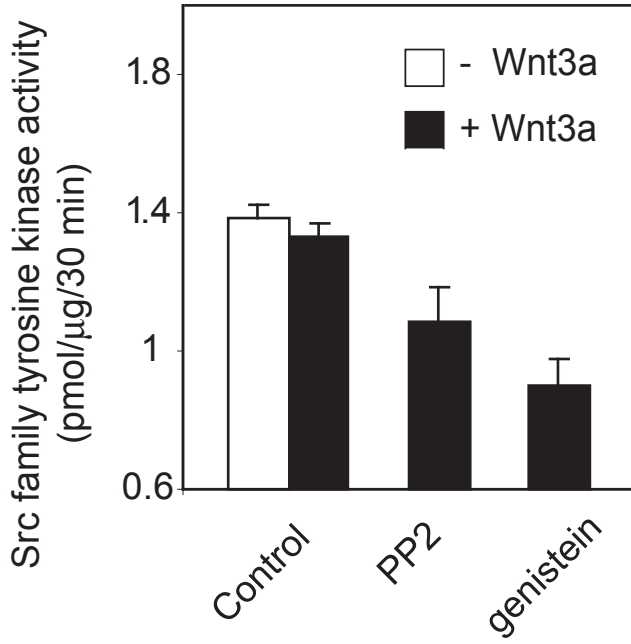

B

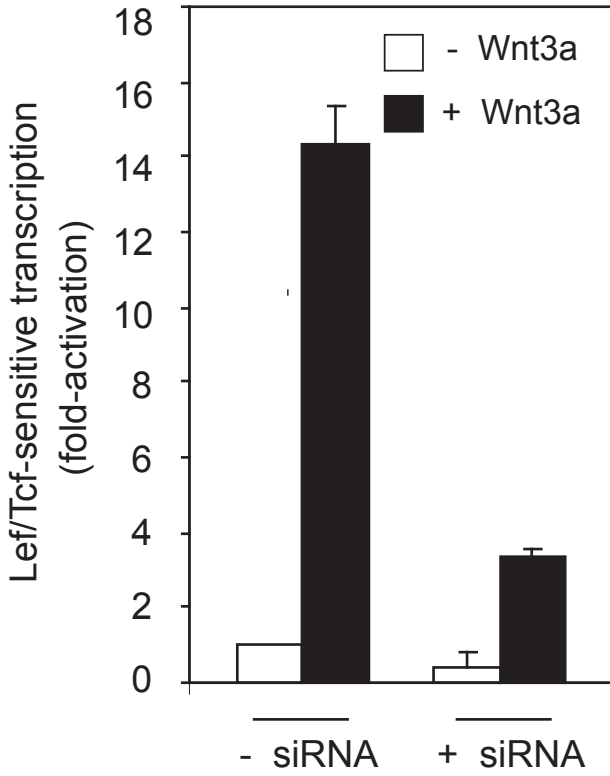

Blot: Yes

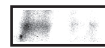

Blot: GAPDH

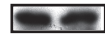

Supplement: supp_122_24_4439__1.pdf [file supp_122_24_4439__1.pdf]

A

HEK293 cell

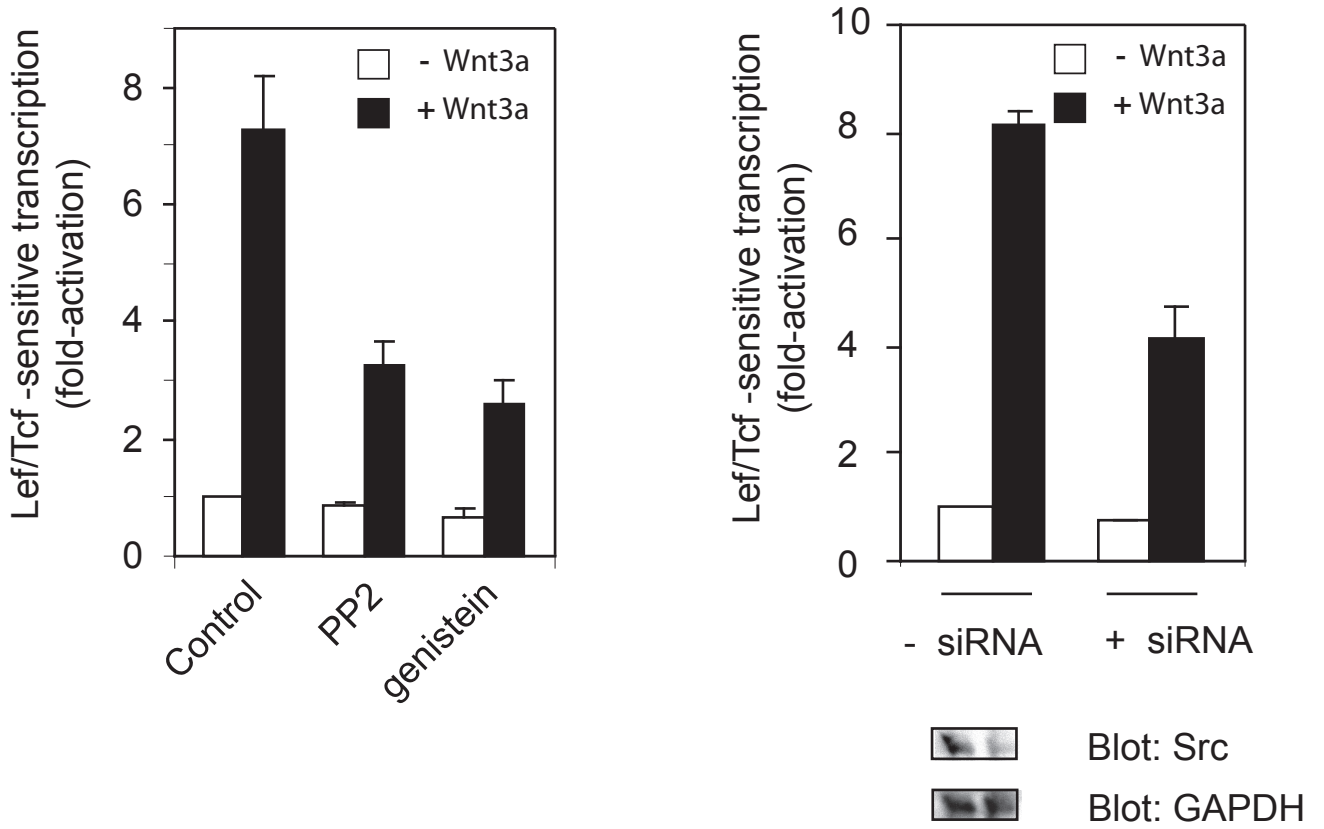

B

Mesenchymal cell

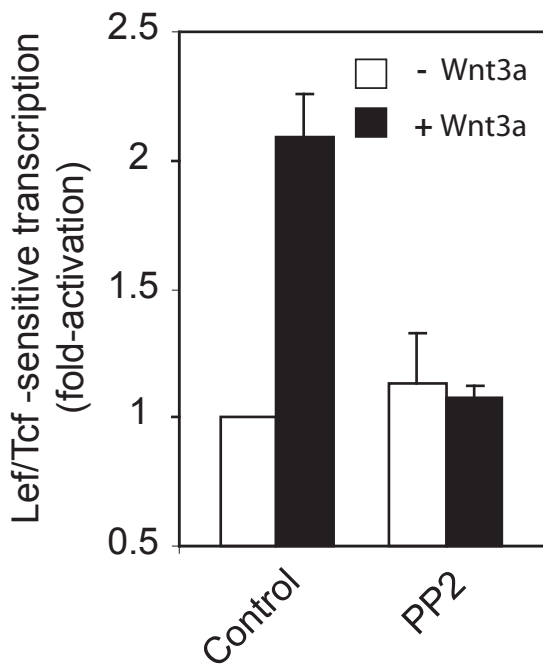

Supplement: supp_122_24_4439__2.pdf [file supp_122_24_4439__2.pdf]

A

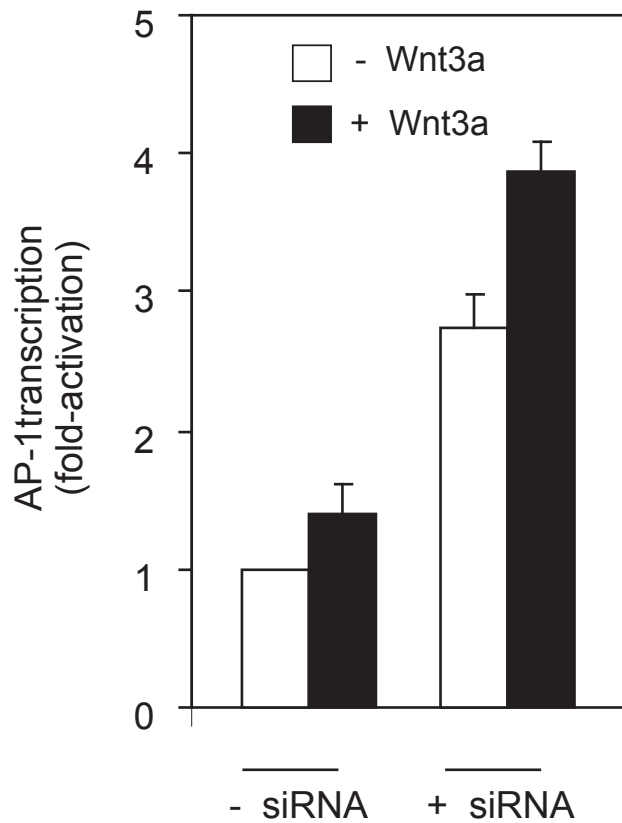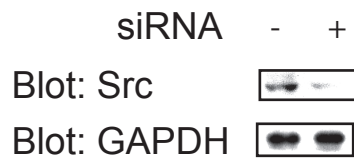

B

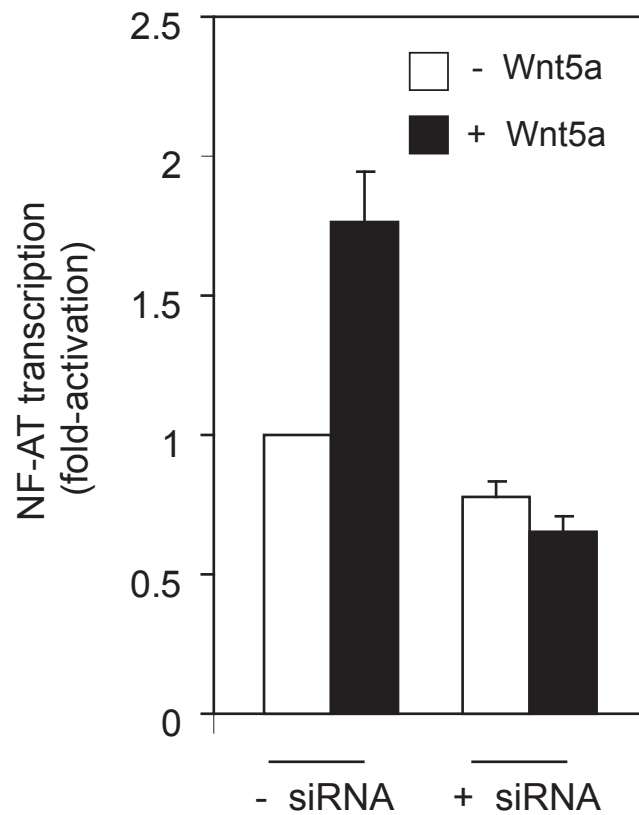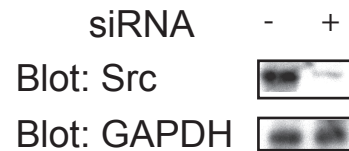

Supplement: supp_122_24_4439__3.pdf [file supp_122_24_4439__3.pdf]

A

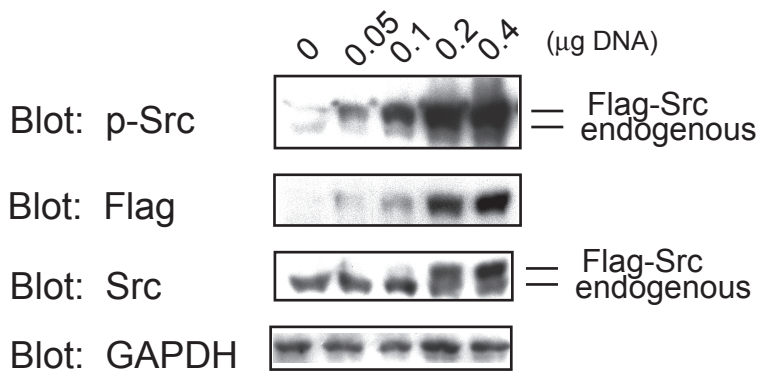

B

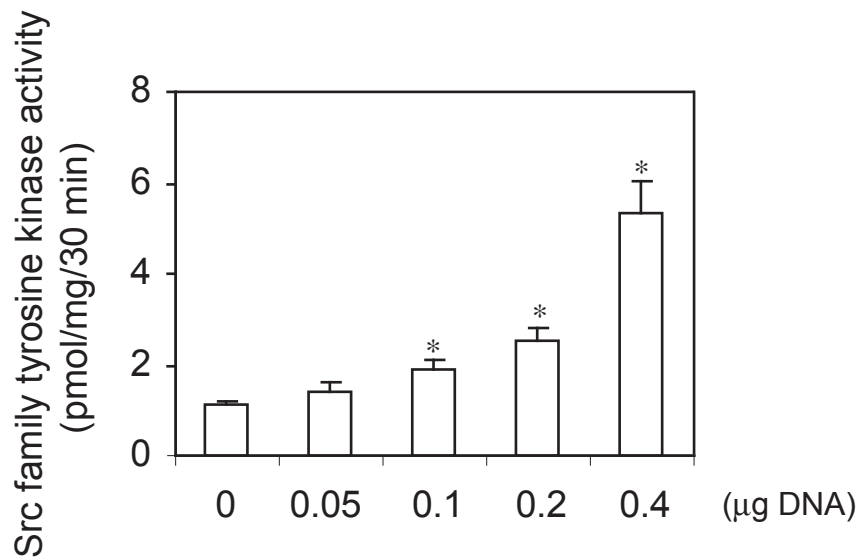

Supplement: supp_122_24_4439__4.pdf [file supp_122_24_4439__4.pdf]

Src domains

GST GST SH2 SH2

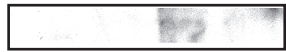

Blot: Dvl2

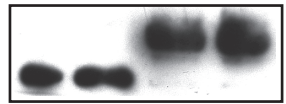

Blot: GST

Wnt3a: - + - +

Supplement: supp_122_24_4439__5.pdf [file supp_122_24_4439__5.pdf]

Src family tyrosine kinase activity  
(pmol/ $\mu$ g/40 min)

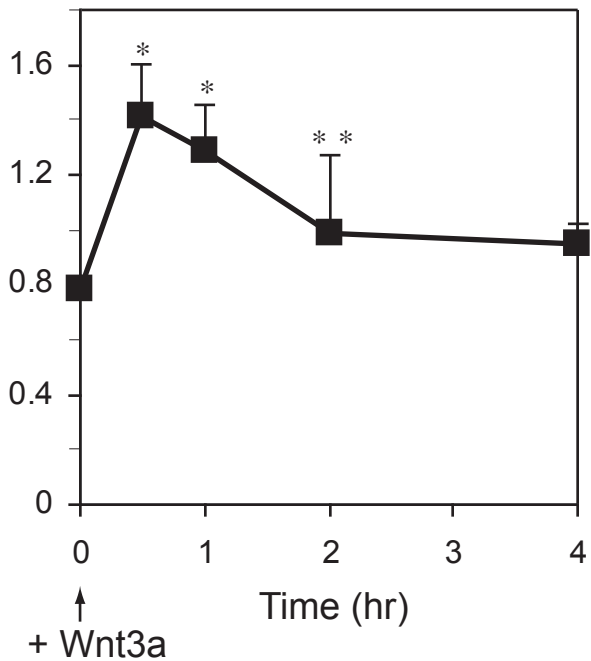

Supplement: supp_122_24_4439__6.pdf [file supp_122_24_4439__6.pdf]

A

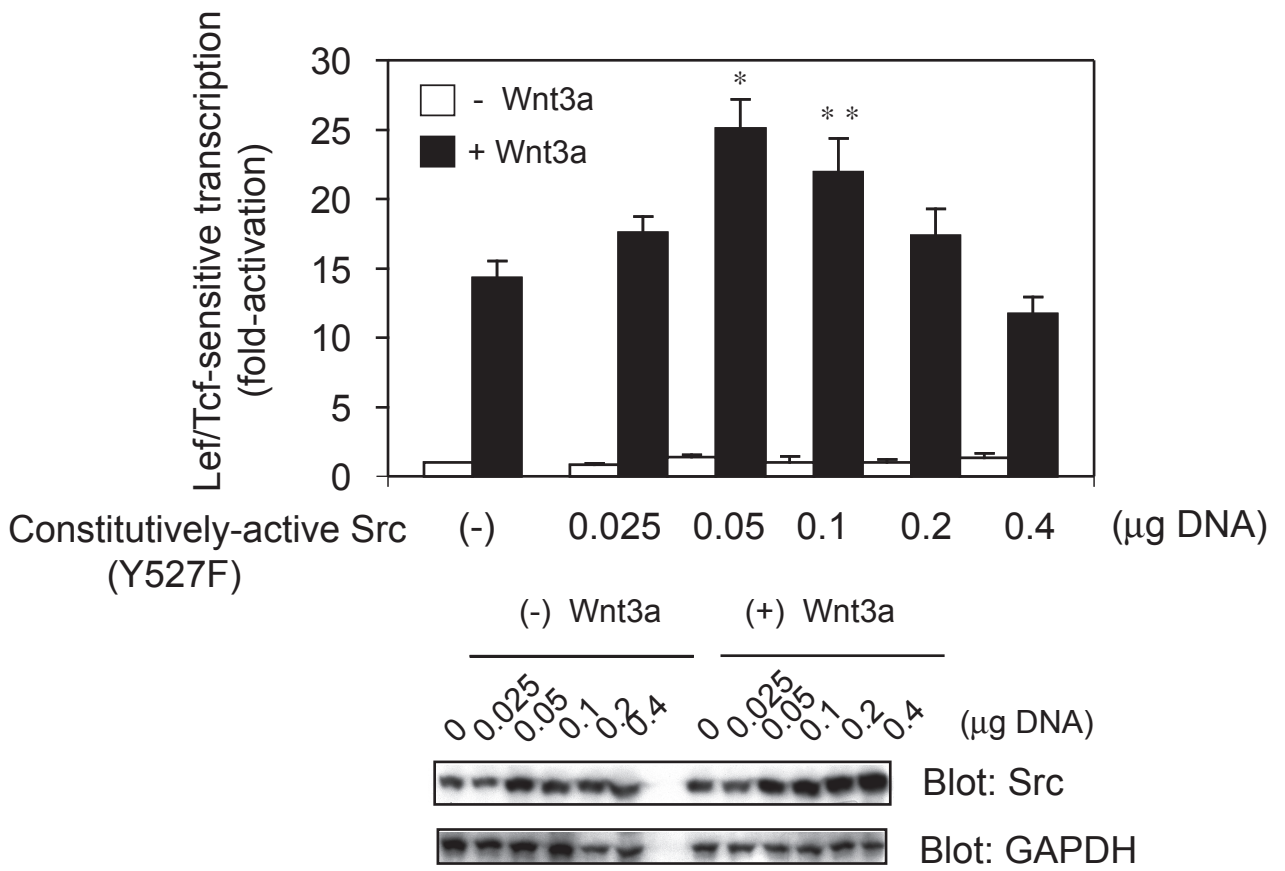

B

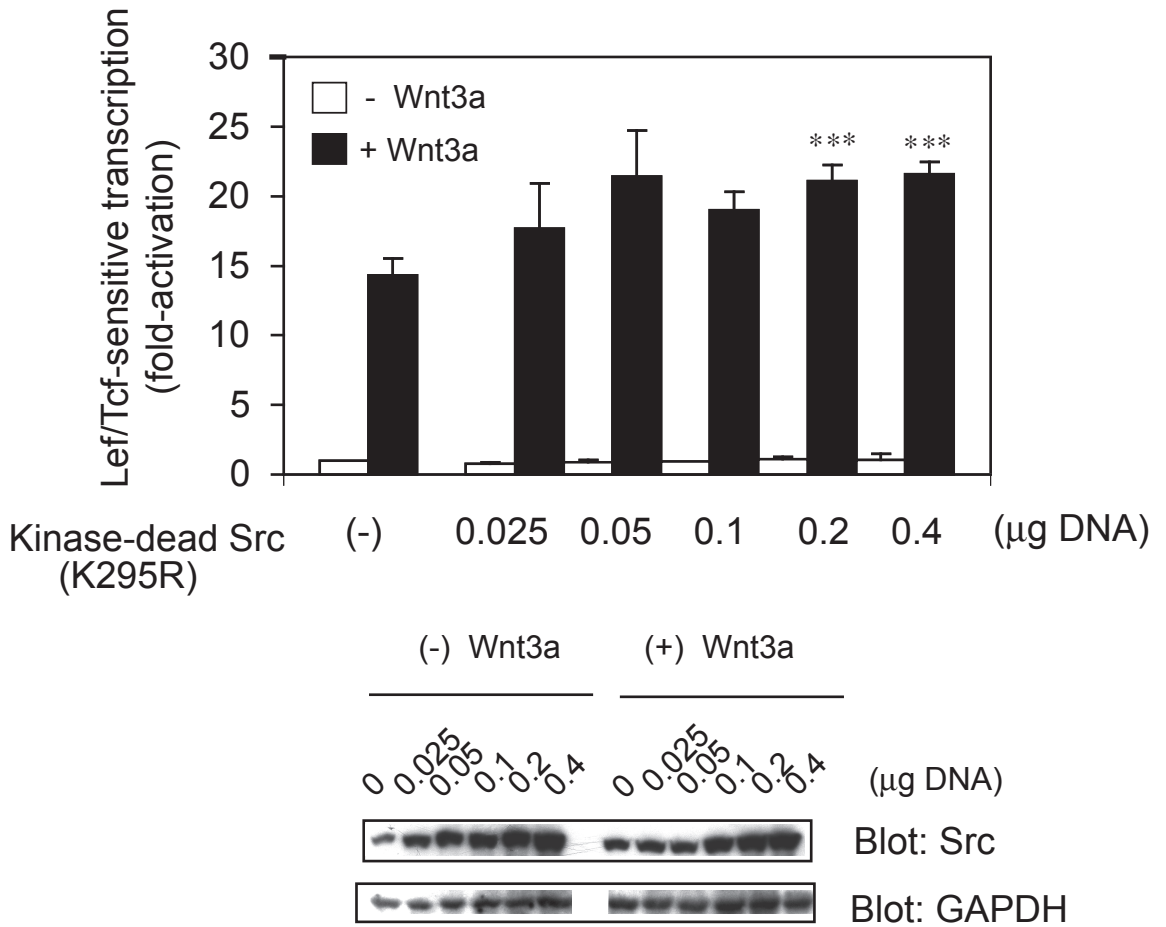

Supplement: supp_122_24_4439__7.pdf [file supp_122_24_4439__7.pdf]

A

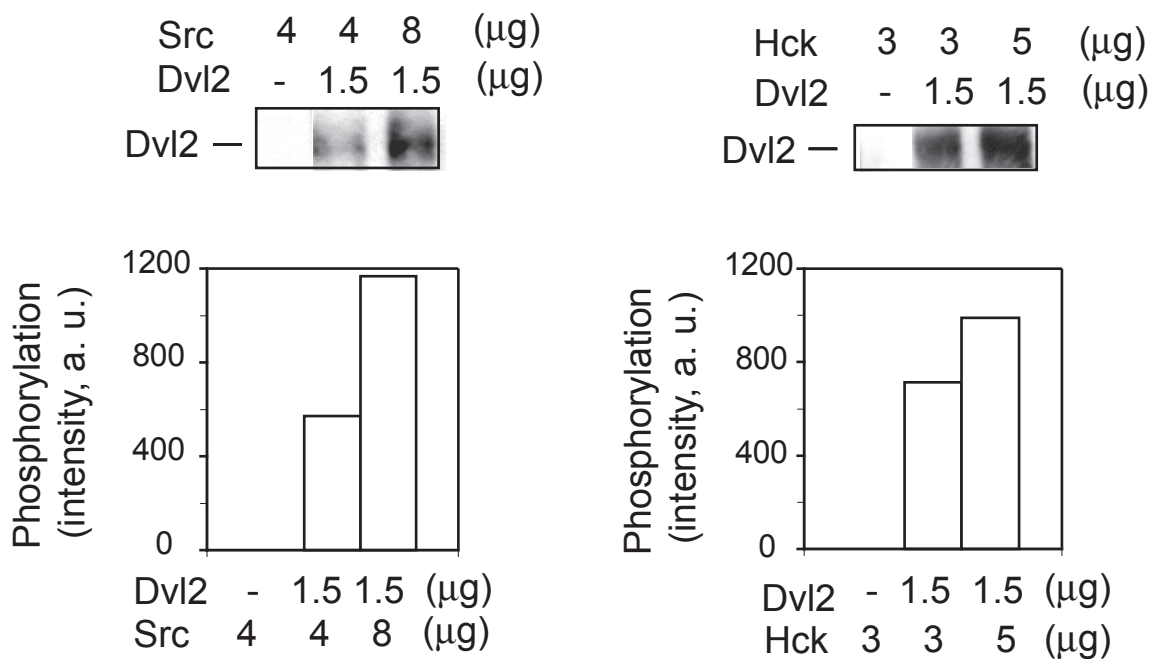

B

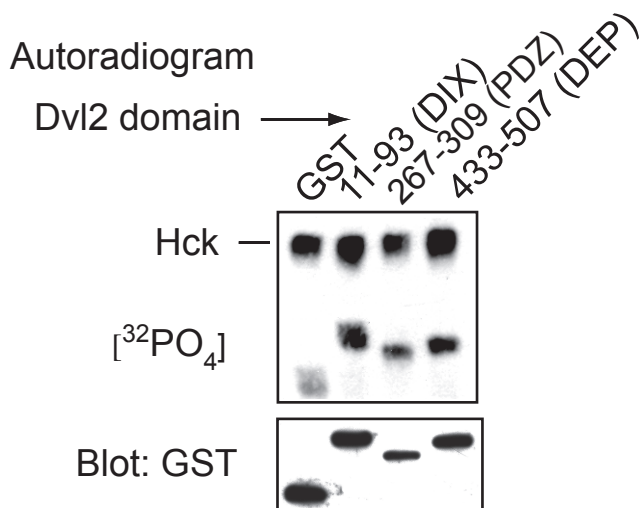

Supplement: supp_122_24_4439__8.pdf [file supp_122_24_4439__8.pdf]
